# Supplementary material for: RNA-seq analysis of potential lncRNAs for age-related hearing loss in a mouse model
Source: publisher site journal article supplement (doi:10.18632/aging.103103), 2020-04-26
Supplement: Supplementary file [file aging-v12i8-103103-supplementary-material-SD1.pdf]

SUPPLEMENTARY FIGURE

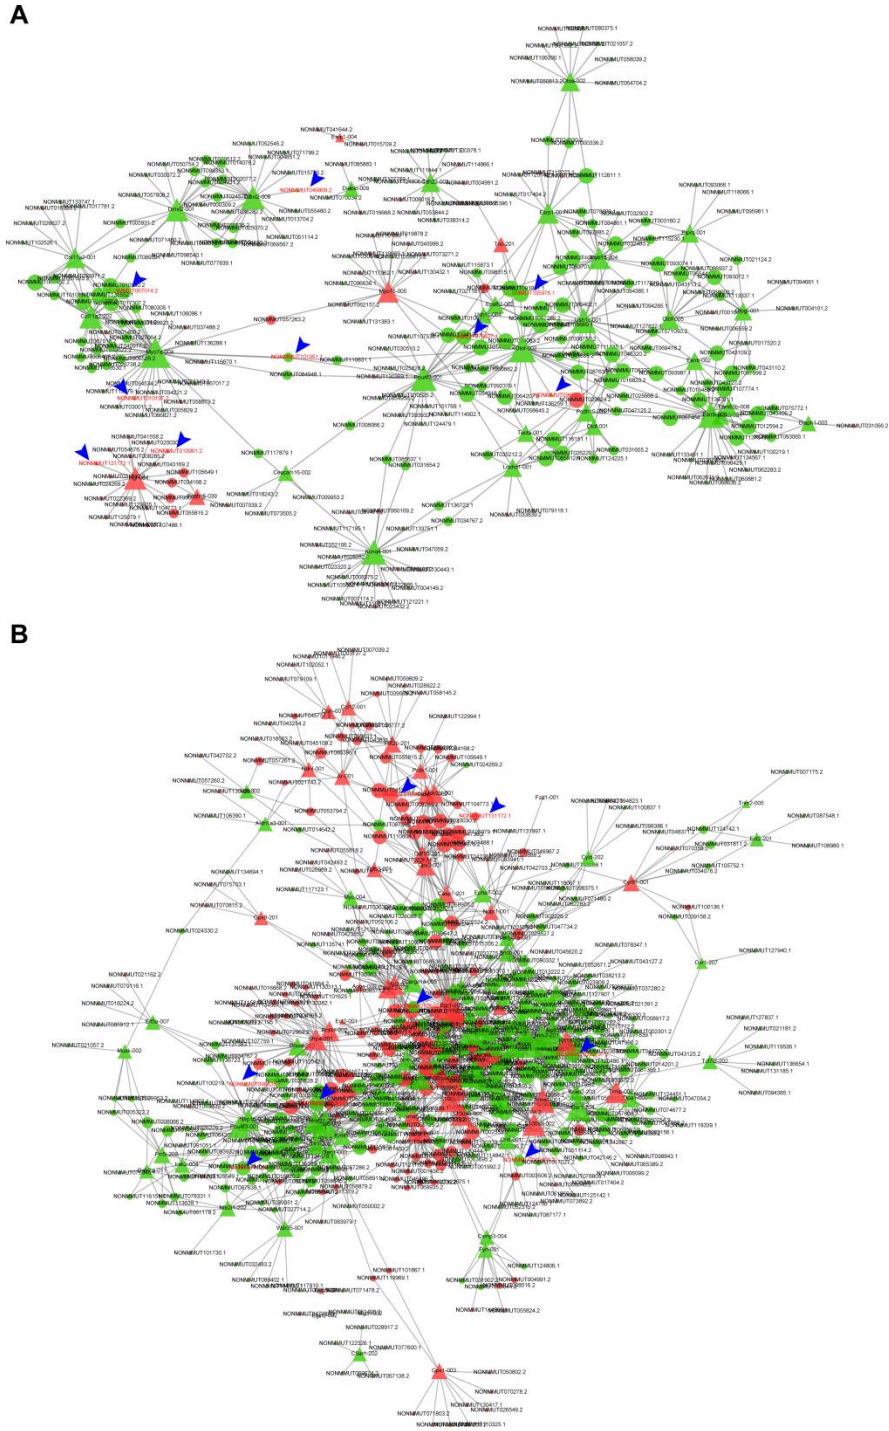

**Supplementary Figure 1. Interaction of coexpressed mRNA-lncRNA. (A)** Network analysis of lncRNA-mRNA associated with deafness. **(B)** Network analysis of lncRNA-mRNA associated with oxidative stress and apoptotic processes. Circular nodes represent lncRNAs; triangle nodes represent mRNAs. Red nodes represent the upregulated transcripts, and green nodes represent the downregulated transcripts. A greater node of mRNAs represents more lncRNAs acting on this one, and a greater node of lncRNAs means more mRNAs are acting on by this one. The selected lncRNAs are marked by the blue arrow.
